# Supplementary material for: Prevalence of and Risk Factors Associated With Mental Health Symptoms Among the General Population in China During the Coronavirus Disease 2019 Pandemic
Source: PubMed Central journal article supplement (PMC7330717; doi:10.1001/jamanetworkopen.2020.14053), 2020-07-01
Supplement: jamanetwopen-3-e2014053-s001.pdf [file jamanetwopen-3-e2014053-s001.pdf]

## Supplementary Online Content

Shi L, Lu Z-A, Que J-Y, et al. Prevalence of and risk factors associated with mental health symptoms among the general population in China during the coronavirus disease 2019 pandemic. *JAMA Netw Open*. 2020;3(7):e2014053. doi:10.1001/jamanetworkopen.2020.14053

**eTable 1.** Summary of First Three Parts of the Questionnaire Related to This Study

**eTable 2.** Factors Associated With Mental Health Symptoms Included in the Regression Model

**eTable 3.** Unadjusted Regression Analysis of Risk Factors for Symptoms of Depression, Anxiety, Insomnia, and Acute Stress

This supplementary material has been provided by the authors to give readers additional information about their work.

**eTable 1. Summary of First Three Parts of the Questionnaire Related to This Study**

| Questions                                                                                                                          | Types           | Choices                                                                                                                                                                                                                                                                                                                                                                                                                                                                                                 |
|------------------------------------------------------------------------------------------------------------------------------------|-----------------|---------------------------------------------------------------------------------------------------------------------------------------------------------------------------------------------------------------------------------------------------------------------------------------------------------------------------------------------------------------------------------------------------------------------------------------------------------------------------------------------------------|
| <b>Part One: Demographic information</b>                                                                                           |                 |                                                                                                                                                                                                                                                                                                                                                                                                                                                                                                         |
| Please select your gender:                                                                                                         | Single choice   | Male/Female                                                                                                                                                                                                                                                                                                                                                                                                                                                                                             |
| Please fill in your age (years):                                                                                                   | Blank           | /                                                                                                                                                                                                                                                                                                                                                                                                                                                                                                       |
| Please fill in your current living geographical region:                                                                            | Blank           | /                                                                                                                                                                                                                                                                                                                                                                                                                                                                                                       |
| Your current living area is:                                                                                                       | Single choice   | Urban/Rural                                                                                                                                                                                                                                                                                                                                                                                                                                                                                             |
| Please fill in your permanent geographical region:                                                                                 | Blank           | /                                                                                                                                                                                                                                                                                                                                                                                                                                                                                                       |
| Please select your highest level of education:                                                                                     | Single choice   | Elementary school or below/Junior high school/Senior high school or vocational school/Bachelor degree or college diploma/Master degree or above                                                                                                                                                                                                                                                                                                                                                         |
| Please select your current marital status:                                                                                         | Single choice   | Married/Unmarried                                                                                                                                                                                                                                                                                                                                                                                                                                                                                       |
| Please select your monthly family income (yuan):                                                                                   | Single choice   | <1000/1000-2999/3000-4999/5000-7999/8000-11999/≥12000                                                                                                                                                                                                                                                                                                                                                                                                                                                   |
| Do you have a history of chronic diseases (hypertension, diabetes, cerebrovascular disease, heart diseases, and malignant tumors)? | Single choice   | Yes/Unknown/No                                                                                                                                                                                                                                                                                                                                                                                                                                                                                          |
| Do you have a history of psychiatric disorders?                                                                                    | Single choice   | Yes/Unknown/No                                                                                                                                                                                                                                                                                                                                                                                                                                                                                          |
| Please select the type of psychiatric disorder you suffer from: (this depends on "Yes" being checked on the last question)         | Multiple choice | Depression/Bipolar disorder/ Schizophrenia/Anxiety/Obsessive-compulsive disorder/Attention deficit hyperactivity disorder/Others/Unknown                                                                                                                                                                                                                                                                                                                                                                |
| Do you have a family history of psychiatric disorders?                                                                             | Single choice   | Yes/Unknown/No                                                                                                                                                                                                                                                                                                                                                                                                                                                                                          |
| Have you ever had any sleep problems?                                                                                              | Single choice   | Yes/No                                                                                                                                                                                                                                                                                                                                                                                                                                                                                                  |
| Do you have the habit of smoking?                                                                                                  | Single choice   | Yes/No                                                                                                                                                                                                                                                                                                                                                                                                                                                                                                  |
| Do you have the habit of drinking alcohol?                                                                                         | Single choice   | Yes/No                                                                                                                                                                                                                                                                                                                                                                                                                                                                                                  |
| Please select your current occupation:                                                                                             | Single choice   | Ordinary full-time students/Medical students/ Graduates/Medical staff/Other medical workers/Scientific researchers/The police, the security guards/Workers in the transportation industry/Community workers or social workers/Other administrative staff/Clerical staff/Other agricultural personnel/Other commercial or service staff/Other professionals (e.g. accountants, lawyers, architects, journalists, etc.)/Other workers/Military personnel/Self-employment or freelancers/Unemployed/Others |
| <b>Part Two: Epidemic-related questions</b>                                                                                        |                 |                                                                                                                                                                                                                                                                                                                                                                                                                                                                                                         |
| Are you infected with COVID-19?                                                                                                    | Single choice   | Confirmed cases/Suspected cases/Not infected                                                                                                                                                                                                                                                                                                                                                                                                                                                            |
| Have any of your family members or friends been infected with COVID-19?                                                            | Single choice   | Yes/No                                                                                                                                                                                                                                                                                                                                                                                                                                                                                                  |
| Have you come in close contact with patients infected with COVID-19?                                                               | Single choice   | Yes/No                                                                                                                                                                                                                                                                                                                                                                                                                                                                                                  |
| Have you been to Hubei province in the past 2 mos?                                                                                 | Single choice   | Yes/No                                                                                                                                                                                                                                                                                                                                                                                                                                                                                                  |

|                                                                                                                                                                      |                                                                           |                                                                                                                                                                                                                                                                                                                                                                                                                                             |
|----------------------------------------------------------------------------------------------------------------------------------------------------------------------|---------------------------------------------------------------------------|---------------------------------------------------------------------------------------------------------------------------------------------------------------------------------------------------------------------------------------------------------------------------------------------------------------------------------------------------------------------------------------------------------------------------------------------|
| Please comment on your level of concern about the COVID-19 epidemic:                                                                                                 | Enter number from 0 (very unconcerned) to 10 (very concerned)             | /                                                                                                                                                                                                                                                                                                                                                                                                                                           |
| Please select the main channels for you to obtain information about the COVID-19 epidemic?                                                                           | Multiple choice                                                           | TV news/Network news/Search engines (e.g. Google, etc.)/Social platform (e.g. WeChat, chat group, ins, etc.)/Broadcast/Paper media/Newspaper brochure/Others                                                                                                                                                                                                                                                                                |
| Please comment on your level of understanding of the COVID-19 epidemic:                                                                                              | Enter number from 0 (understand very little) to 10 (understand very well) | /                                                                                                                                                                                                                                                                                                                                                                                                                                           |
| Are you a frontline worker of COVID-19?                                                                                                                              | Single choice                                                             | Yes/No                                                                                                                                                                                                                                                                                                                                                                                                                                      |
| Are any of your family members or friends frontline workers?                                                                                                         | Single choice                                                             | Yes/No                                                                                                                                                                                                                                                                                                                                                                                                                                      |
| Are you back to work now?                                                                                                                                            | Single choice                                                             | Yes/No                                                                                                                                                                                                                                                                                                                                                                                                                                      |
| If you are currently working, what is your workplace? (this depends on "Yes" being checked in the last question)                                                     | Single choice                                                             | Work at home/Work not at home                                                                                                                                                                                                                                                                                                                                                                                                               |
| Are you likely to be exposed to other people at work?                                                                                                                | Single choice                                                             | Close contact ( $\leq 1.5$ m) to patients infected with COVID-19/Non-close contact ( $> 1.5$ m) with patients infected with COVID-19/Close contact ( $\leq 1.5$ m) with patients with other diseases/Non-close contact ( $> 1.5$ m) with patients with other diseases/Close contact ( $\leq 1.5$ m) with general people/Non-close contact ( $> 1.5$ m) with general people/Not at work, work at home, or without exposure to people at work |
| What is the impact of the COVID-19 pandemic on your work?                                                                                                            | Multiple choice                                                           | Unemployment/Postponement of work/Impact on income/ Busier than ever/No impact/Others                                                                                                                                                                                                                                                                                                                                                       |
| <b>Part Three: Isolation conditions and social attitudes toward the COVID-19 pandemic</b>                                                                            |                                                                           |                                                                                                                                                                                                                                                                                                                                                                                                                                             |
| Was there any traffic control in your area during the pandemic?                                                                                                      | Single choice                                                             | Yes/No                                                                                                                                                                                                                                                                                                                                                                                                                                      |
| Do you live in a community that restricts people's access?                                                                                                           | Single choice                                                             | Yes/No                                                                                                                                                                                                                                                                                                                                                                                                                                      |
| Have you ever experienced quarantine?                                                                                                                                | Single choice                                                             | Centralized quarantine/Home quarantine/No quarantine                                                                                                                                                                                                                                                                                                                                                                                        |
| How long have you been quarantining? (this depends on "centralized quarantine" or "home quarantine" being checked on the last question )                             | Single choice                                                             | Fewer than 7 days/7-13 days/14 days/More than 14 days                                                                                                                                                                                                                                                                                                                                                                                       |
| Do you quarantine as required? (this depends on "centralized quarantine" or "home quarantine" being checked on the question "Have you ever experienced quarantine?") | Single choice                                                             | Yes/No                                                                                                                                                                                                                                                                                                                                                                                                                                      |
| If you don't quarantine as required, what's the reason? (this depends on "No" being checked on the last question)                                                    | Multiple choice                                                           | I must go out under special circumstances/I don't need quarantine since I'm not infected /I cannot stand the feeling of boringness and loneliness due to quarantine/Others                                                                                                                                                                                                                                                                  |
| To what extent are you worried about being infected with COVID-19?                                                                                                   | Single choice                                                             | Not at all/Slight/Moderate/Significant/Severe                                                                                                                                                                                                                                                                                                                                                                                               |

|                                                                                                                                    |                                                                            |                                                                                                                                                                                                                                             |
|------------------------------------------------------------------------------------------------------------------------------------|----------------------------------------------------------------------------|---------------------------------------------------------------------------------------------------------------------------------------------------------------------------------------------------------------------------------------------|
| How long do you think the pandemic will take to be controlled?                                                                     | Single choice                                                              | Fewer than 1 month/2-3 months/4-6 months/More than 6 months                                                                                                                                                                                 |
| What do you think are the difficulties in the current pandemic prevention and control?                                             | Multiple choice                                                            | Shortage of protection materials/Insufficient medical personnel and medical resources/Patients/People under quarantine don't understand or cooperate/People are not fully aware of the importance of self-protection/Mental problems/Others |
| Are you stressed due to the local pandemic and various restriction policies?                                                       | Single choice                                                              | Yes/No                                                                                                                                                                                                                                      |
| What's your main stressor?(this depends on "Yes" being checked on the last question)                                               | Multiple choice                                                            | The severity of the pandemic/Various access restriction policies/Worries about their own and family members' safety/Worries about the safety of medical personnel working in frontline/Others                                               |
| To what extent you feel stressed before the pandemic?                                                                              | Enter the number from 0 (no stress) to 10 (extreme stress)                 | /                                                                                                                                                                                                                                           |
| Would you like to learn psychological knowledge disseminated by media before the pandemic?                                         | Single choice                                                              | Yes/No                                                                                                                                                                                                                                      |
| Would you like to learn psychological intervention and therapy knowledge before the pandemic?                                      | Single choice                                                              | Yes/No                                                                                                                                                                                                                                      |
| To what extent the difficulty you encountered in finding information about psychological therapy and intervention before pandemic? | Enter the number from 0 (not difficult at all) to 10 (extremely difficult) | /                                                                                                                                                                                                                                           |
| To what extent you feel stressed after the pandemic?                                                                               | Enter the number from 0 (no stress) to 10 (extreme stress)                 | /                                                                                                                                                                                                                                           |
| Would you like to learn psychological knowledge disseminated by media after the pandemic?                                          | Single choice                                                              | Yes/No                                                                                                                                                                                                                                      |
| Would you like to learn psychological intervention and therapy knowledge after the pandemic?                                       | Single choice                                                              | Yes/No                                                                                                                                                                                                                                      |
| To what extent the difficulty you encountered in finding information about psychological therapy and intervention after pandemic?  | Enter the number from 0 (not difficult at all) to 10 (extremely difficult) | /                                                                                                                                                                                                                                           |
| I would report and seek treatment if I was infected                                                                                | Single choice                                                              | Yes/No                                                                                                                                                                                                                                      |
| For what reason you would not report and seek treatment? (this depends on "No" being checked on the last question)                 | Multiple choice                                                            | Worries about the judgement of people/Worries about being labeled/Impact on later life/Invasion of privacy/Family factors (e.g. worries about parents or children, etc.)/Worries about treatment effects/Others                             |
| Are you in Hubei now?                                                                                                              | Single choice                                                              | Yes, I'm in Wuhan/Yes, I'm in another city of Hubei/No                                                                                                                                                                                      |

|                                                                                                                   |                  |                                                                           |
|-------------------------------------------------------------------------------------------------------------------|------------------|---------------------------------------------------------------------------|
| Did you return from Hubei to your current location?(this depends on "No" being checked on the last question)      | Single choice    | Yes, I returned from Wuhan /Yes, I returned from another city of Hubei/No |
| Social attitudes towards and perceived discrimination among people in the most severely affected area by COVID-19 | Items and scales | /                                                                         |

**eTable 2. Factors Associated With Mental Health Symptoms Included in the Regression Model.**

| Factors                                        | Definitions                                                                                                                                                                                                                                                      | Types of variables | Reference category                                 | Summarizing forms                         |
|------------------------------------------------|------------------------------------------------------------------------------------------------------------------------------------------------------------------------------------------------------------------------------------------------------------------|--------------------|----------------------------------------------------|-------------------------------------------|
| <b>Gender</b>                                  | In the following 2 categories: 1.male; 2.female                                                                                                                                                                                                                  | Categorical        | Female                                             | Odds ratio with a 95% confidence interval |
| <b>Age (years)</b>                             | In the following 2 categories: 1.18-39; 2.≥ 40                                                                                                                                                                                                                   | Categorical        | ≥ 40                                               | Odds ratio with a 95% confidence interval |
| <b>Living area</b>                             | In the following 2 categories: 1.urban; 2.rural                                                                                                                                                                                                                  | Categorical        | Rural                                              | Odds ratio with a 95% confidence interval |
| <b>Level of education</b>                      | In the following 2 categories: 1. less than college; 2. college or higher                                                                                                                                                                                        | Categorical        | College or higher                                  | Odds ratio with a 95% confidence interval |
| <b>Marital status</b>                          | In the following 2 categories: 1.married; 2.unmarried                                                                                                                                                                                                            | Categorical        | Unmarried                                          | Odds ratio with a 95% confidence interval |
| <b>Monthly family income(yuan)</b>             | In the following 3 categories: 1.0-4999; 2.5000-11999; 3. ≥ 12000                                                                                                                                                                                                | Categorical        | ≥ 12000                                            | Odds ratio with a 95% confidence interval |
| <b>History of chronic diseases</b>             | Yes if the participant had a history of chronic diseases (including hypertension, diabetes, cardiovascular diseases, heart diseases and malignant tumors); unknown if participants reported to be unclear of their own history of chronic diseases; no otherwise | Categorical        | Not with a history of chronic diseases             | Odds ratio with a 95% confidence interval |
| <b>History of psychiatric disorders</b>        | Yes if the participant had a history of psychiatric disorders; unknown if participants reported to be unclear of their own history of psychiatric disorders; no otherwise                                                                                        | Categorical        | Not with a history of psychiatric disorders        | Odds ratio with a 95% confidence interval |
| <b>Family history of psychiatric disorders</b> | Yes if the participant had family history of psychiatric disorders; unknown if participants reported to be unclear of their family history of psychiatric disorders; no otherwise                                                                                | Categorical        | Not with a family history of psychiatric disorders | Odds ratio with a 95% confidence interval |

|                                                                                |                                                                                                                                                                                                                                                                                                                               |             |                                                                            |                                           |
|--------------------------------------------------------------------------------|-------------------------------------------------------------------------------------------------------------------------------------------------------------------------------------------------------------------------------------------------------------------------------------------------------------------------------|-------------|----------------------------------------------------------------------------|-------------------------------------------|
| <b>Are you infected with COVID-19?</b>                                         | In the following 2 categories:<br>1.confirmed or suspected cases of COVID-19; 2.not infected                                                                                                                                                                                                                                  | Categorical | Not infected                                                               | Odds ratio with a 95% confidence interval |
| <b>Are you a frontline worker?</b>                                             | Yes if the participant directly participated in the control of COVID-19, covering a wide range of occupations (e.g., medicine, research, public health, media, security work, police, community work, emergency material delivery services, charity, construction, management, and psychological interventions); no otherwise | Categorical | Not involved in frontline work of COVID-19                                 | Odds ratio with a 95% confidence interval |
| <b>Have any of your family members or friends been infected with COVID-19?</b> | Yes if the participant reported to have at least a family member or friend infected with COVID-19 according to their known situation; no otherwise                                                                                                                                                                            | Categorical | Not having any family member or friend infected with COVID-19              | Odds ratio with a 95% confidence interval |
| <b>Are any of your family members or friends frontline workers?</b>            | Yes if the participant reported to have at least a family member or friend directly participating in the control of COVID-19 according to their known situation; no otherwise                                                                                                                                                 | Categorical | Not having any family member or friend being frontline workers of COVID-19 | Odds ratio with a 95% confidence interval |
| <b>Have you come in close contact with patients infected with COVID-19?</b>    | Yes if the participant reported to have direct contact with confirmed or suspected cases of COVID-19 (including family members who lived with patients, colleagues who worked with patients, classmates who studied with patients, passengers who took the same vehicle as patients, etc.); no otherwise                      | Categorical | Not having come in close contact with patients infected with COVID-19      | Odds ratio with a 95% confidence interval |
| <b>Are you in Hubei province now?</b>                                          | Yes if the participant reported to be in Hubei province when completing the questionnaire; no otherwise                                                                                                                                                                                                                       | Categorical | Not in Hubei province at present                                           | Odds ratio with a 95% confidence interval |
| <b>Have you been to Hubei province in the past 2 months?</b>                   | Yes if the participant reported to have been to Hubei province in the past 2 months; no otherwise                                                                                                                                                                                                                             | Categorical | Not been to Hubei province in the past 2 months                            | Odds ratio with a 95% confidence interval |
| <b>Have you ever experienced quarantine?</b>                                   | In the following 3 categories:<br>1.centralized quarantine; 2.home quarantine; 3. no quarantine experience                                                                                                                                                                                                                    | Categorical | No quarantine experience                                                   | Odds ratio with a 95% confidence interval |

|                                                              |                                                                                                                                                                                                                                                                                                                                                    |             |                                                                  |                                           |
|--------------------------------------------------------------|----------------------------------------------------------------------------------------------------------------------------------------------------------------------------------------------------------------------------------------------------------------------------------------------------------------------------------------------------|-------------|------------------------------------------------------------------|-------------------------------------------|
| <b>Are you back to work now?</b>                             | In the following 3 categories:<br>1.work at home; 2.work not at home; 3.not back to work                                                                                                                                                                                                                                                           | Categorical | Not back to work                                                 | Odds ratio with a 95% confidence interval |
| <b>Are you likely to be exposed to other people at work?</b> | In the following 4 categories:<br>1.exposed to patients infected with COVID-19 (eg. sanitary workers in the ward hospitalizing COVID-19 patients); 2. exposed to patients with other diseases (eg. ambulance drivers); 3. exposed to general people (eg. supermarket workers); 4. not at work, work at home, or without exposure to people at work | Categorical | Not at work, work at home, or without exposure to people at work | Odds ratio with a 95% confidence interval |

h

**eTable 3. Unadjusted Regression Analysis of Risk Factors for Symptoms of Depression, Anxiety, Insomnia, and Acute Stress**

| Variables                           | Depression <sup>a</sup> |         | Anxiety <sup>b</sup> |         | Insomnia <sup>c</sup> |         | Acute stress <sup>d</sup> |         |
|-------------------------------------|-------------------------|---------|----------------------|---------|-----------------------|---------|---------------------------|---------|
|                                     | OR (95% CI)             | P value | OR (95% CI)          | P value | OR (95% CI)           | P value | OR (95% CI)               | P value |
| <b>Gender</b>                       |                         |         |                      |         |                       |         |                           |         |
| Male                                | 1.23 (1.19-1.28)        | < .001  | 1.02 (0.99-1.06)     | .19     | 1.18 (1.14-1.22)      | < .001  | 1.25 (1.20-1.29)          | < .001  |
| Female                              | 1 [Reference]           |         | 1 [Reference]        |         | 1 [Reference]         |         | 1 [Reference]             |         |
| <b>Age (years)</b>                  |                         |         |                      |         |                       |         |                           |         |
| 18-39                               | 1.44 (1.38-1.50)        | < .001  | 1.30 (1.25-1.35)     | < .001  | 1.12 (1.07-1.16)      | < .001  | 1.28 (1.22-1.33)          | < .001  |
| ≥ 40                                | 1 [Reference]           |         | 1 [Reference]        |         | 1 [Reference]         |         | 1 [Reference]             |         |
| <b>Living area</b>                  |                         |         |                      |         |                       |         |                           |         |
| Urban                               | 0.88 (0.82-0.95)        | .001    | 0.85 (0.80-0.91)     | < .001  | 0.99 (0.92-1.06)      | .72     | 0.93 (0.86-1.00)          | .06     |
| Rural                               | 1 [Reference]           |         | 1 [Reference]        |         | 1 [Reference]         |         | 1 [Reference]             |         |
| <b>Level of education</b>           |                         |         |                      |         |                       |         |                           |         |
| Less than college                   | 1.06 (1.01-1.11)        | .03     | 1.20 (1.15-1.26)     | < .001  | 0.99 (0.94-1.03)      | .55     | 1.03 (0.98-1.09)          | .22     |
| College or higher                   | 1 [Reference]           |         | 1 [Reference]        |         | 1 [Reference]         |         | 1 [Reference]             |         |
| <b>Marital status</b>               |                         |         |                      |         |                       |         |                           |         |
| Married                             | 0.71 (0.68-0.74)        | < .001  | 0.92 (0.88-0.96)     | < .001  | 0.72 (0.69-0.75)      | < .001  | 0.82 (0.78-0.86)          | < .001  |
| Unmarried                           | 1 [Reference]           |         | 1 [Reference]        |         | 1 [Reference]         |         | 1 [Reference]             |         |
| <b>Monthly family income (yuan)</b> |                         |         |                      |         |                       |         |                           |         |
| 0-4999                              | 1.52 (1.44-1.60)        | < .001  | 1.48 (1.41-1.55)     | < .001  | 1.23 (1.17-1.29)      | < .001  | 1.38 (1.31-1.46)          | < .001  |
| 5000-11999                          | 1.24 (1.19-1.30)        | < .001  | 1.20 (1.15-1.25)     | < .001  | 1.11 (1.06-1.16)      | < .001  | 1.18 (1.13-1.24)          | < .001  |
| ≥ 12000                             | 1 [Reference]           |         | 1 [Reference]        |         | 1 [Reference]         |         | 1 [Reference]             |         |
| <b>History of chronic diseases</b>  |                         |         |                      |         |                       |         |                           |         |
| Yes                                 | 1.15 (1.07-1.24)        | < .001  | 1.08 (1.00-1.16)     | .06     | 1.51 (1.40-1.62)      | < .001  | 1.13 (1.05-1.23)          | .002    |
| Unknown                             | 1.87 (1.69-2.07)        | < .001  | 1.68 (1.52-1.86)     | < .001  | 2.14 (1.93-2.37)      | < .001  | 1.63 (1.46-1.81)          | < .001  |



|                                                                                |                   |        |                  |        |                  |        |                   |        |
|--------------------------------------------------------------------------------|-------------------|--------|------------------|--------|------------------|--------|-------------------|--------|
| No                                                                             | 1 [Reference]     |        | 1 [Reference]    |        | 1 [Reference]    |        | 1 [Reference]     |        |
| <b>History of psychiatric disorders</b>                                        |                   |        |                  |        |                  |        |                   |        |
| Yes                                                                            | 3.01 (2.21-4.10)  | < .001 | 2.27 (1.67-3.10) | < .001 | 2.54 (1.87-3.47) | < .001 | 2.12 (1.55-2.91)  | < .001 |
| Unknown                                                                        | 3.51 (2.86-4.30)  | < .001 | 2.69 (2.20-3.29) | < .001 | 3.07 (2.51-3.77) | < .001 | 2.87 (2.34-3.51)  | < .001 |
| No                                                                             | 1 [Reference]     |        | 1 [Reference]    |        | 1 [Reference]    |        | 1 [Reference]     |        |
| <b>Family history of psychiatric disorders</b>                                 |                   |        |                  |        |                  |        |                   |        |
| Yes                                                                            | 1.88 (1.54-2.29)  | < .001 | 1.47 (1.20-1.80) | < .001 | 1.99 (1.63-2.42) | < .001 | 1.43 (1.16-1.77)  | .001   |
| Unknown                                                                        | 2.33 (1.99-2.74)  | < .001 | 1.89 (1.61-2.22) | < .001 | 2.15 (1.84-2.53) | < .001 | 1.95 (1.65-2.30)  | < .001 |
| No                                                                             | 1 [Reference]     |        | 1 [Reference]    |        | 1 [Reference]    |        | 1 [Reference]     |        |
| <b>Are you infected with COVID-19?</b>                                         |                   |        |                  |        |                  |        |                   |        |
| Confirmed or suspected cases                                                   | 7.79 (4.95-12.26) | < .001 | 5.32 (3.45-8.20) | < .001 | 5.16 (3.39-7.86) | < .001 | 7.63 (4.95-11.76) | < .001 |
| Not infected                                                                   | 1 [Reference]     |        | 1 [Reference]    |        | 1 [Reference]    |        | 1 [Reference]     |        |
| <b>Are you a frontline worker?</b>                                             |                   |        |                  |        |                  |        |                   |        |
| Yes                                                                            | 1.16 (1.10-1.22)  | < .001 | 1.14 (1.09-1.19) | < .001 | 1.20 (1.14-1.26) | < .001 | 1.21 (1.15-1.27)  | < .001 |
| No                                                                             | 1 [Reference]     |        | 1 [Reference]    |        | 1 [Reference]    |        | 1 [Reference]     |        |
| <b>Have any of your family members or friends been infected with COVID-19?</b> |                   |        |                  |        |                  |        |                   |        |
| Yes                                                                            | 2.29 (1.95-2.69)  | < .001 | 2.13 (1.82-2.50) | < .001 | 2.29 (1.95-2.69) | < .001 | 2.31 (1.97-2.72)  | < .001 |
| No                                                                             | 1 [Reference]     |        | 1 [Reference]    |        | 1 [Reference]    |        | 1 [Reference]     |        |
| <b>Are any of your family members or friends frontline workers?</b>            |                   |        |                  |        |                  |        |                   |        |
| Yes                                                                            | 1.10 (1.06-1.15)  | < .001 | 1.11 (1.06-1.15) | < .001 | 1.18 (1.13-1.23) | < .001 | 1.08 (1.03-1.12)  | < .001 |
| No                                                                             | 1 [Reference]     |        | 1 [Reference]    |        | 1 [Reference]    |        | 1 [Reference]     |        |
| <b>Have you come in close contact with patients infected with COVID-19?</b>    |                   |        |                  |        |                  |        |                   |        |
| Yes                                                                            | 3.04 (2.33-3.96)  | < .001 | 2.36 (1.81-3.08) | < .001 | 3.12 (2.39-4.08) | < .001 | 2.34 (1.79-3.06)  | < .001 |
| No                                                                             | 1 [Reference]     |        | 1 [Reference]    |        | 1 [Reference]    |        | 1 [Reference]     |        |
| <b>Are you in Hubei province now?</b>                                          |                   |        |                  |        |                  |        |                   |        |
| Yes                                                                            | 1.83 (1.68-1.99)  | < .001 | 1.81 (1.67-1.97) | < .001 | 1.53 (1.41-1.67) | < .001 | 1.61 (1.48-1.76)  | < .001 |

|                                                                  |                  |        |                  |        |                  |        |                  |        |
|------------------------------------------------------------------|------------------|--------|------------------|--------|------------------|--------|------------------|--------|
| No                                                               | 1 [Reference]    |        | 1 [Reference]    |        | 1 [Reference]    |        | 1 [Reference]    |        |
| <b>Have you been to Hubei province in the past 2 mos?</b>        |                  |        |                  |        |                  |        |                  |        |
| Yes                                                              | 1.59 (1.46-1.73) | < .001 | 1.57 (1.45-1.71) | < .001 | 1.42 (1.30-1.54) | < .001 | 1.36 (1.25-1.49) | < .001 |
| No                                                               | 1 [Reference]    |        | 1 [Reference]    |        | 1 [Reference]    |        | 1 [Reference]    |        |
| <b>Have you ever experienced quarantine?</b>                     |                  |        |                  |        |                  |        |                  |        |
| Centralized                                                      | 1.76 (1.49-2.08) | < .001 | 1.77 (1.50-2.09) | < .001 | 2.00 (1.70-2.36) | < .001 | 1.90 (1.60-2.25) | < .001 |
| Home                                                             | 1.39 (1.34-1.45) | < .001 | 1.36 (1.31-1.42) | < .001 | 1.29 (1.24-1.34) | < .001 | 1.35 (1.29-1.41) | < .001 |
| None                                                             | 1 [Reference]    |        | 1 [Reference]    |        | 1 [Reference]    |        | 1 [Reference]    |        |
| <b>Are you back to work now?</b>                                 |                  |        |                  |        |                  |        |                  |        |
| Work at home                                                     | 0.90 (0.85-0.95) | < .001 | 0.90 (0.85-0.96) | < .001 | 0.99 (0.93-1.05) | .64    | 1.00 (0.94-1.06) | .90    |
| Work not at home                                                 | 0.81(0.78-0.84)  | < .001 | 0.86 (0.83-0.89) | < .001 | 0.89(0.86-0.93)  | < .001 | 0.89(0.86-0.93)  | < .001 |
| Not back to work                                                 | 1 [Reference]    |        | 1 [Reference]    |        | 1 [Reference]    |        | 1 [Reference]    |        |
| <b>Are you likely to be exposed to other people at work?</b>     |                  |        |                  |        |                  |        |                  |        |
| Exposed to patients infected with COVID-19                       | 1.82 (1.68-1.97) | < .001 | 1.87 (1.73-2.02) | < .001 | 1.49 (1.38-1.62) | < .001 | 2.05 (1.89-2.22) | < .001 |
| Exposed to patients with other diseases                          | 1.49 (1.34-1.65) | < .001 | 1.42 (1.28-1.57) | < .001 | 1.37 (1.23-1.52) | < .001 | 1.64 (1.48-1.83) | < .001 |
| Exposed to general people                                        | 0.85 (0.81-0.88) | < .001 | 0.89 (0.85-0.93) | < .001 | 0.94 (0.90-0.97) | .001   | 0.89 (0.85-0.93) | < .001 |
| Not at work, work at home, or without exposure to people at work | 1 [Reference]    |        | 1 [Reference]    |        | 1 [Reference]    |        | 1 [Reference]    |        |

<sup>a</sup> Depression was defined as Patient Health Questionnaire–9 score  $\geq 5$ . <sup>b</sup> Anxiety was defined as Generalized Anxiety Disorder–7 score  $\geq 5$ . <sup>c</sup> Insomnia was defined as Insomnia Severity Index score  $\geq 8$ . <sup>d</sup> Acute stress was defined as having an Acute Stress Disorder Scale dissociative cluster score  $\geq 9$  and cumulative re-experiencing, avoidance, and arousal cluster score  $\geq 28$ .
